# Supplementary material for: The Prognostic Role of SIRT1-Autophagy Axis in Gastric Cancer
Source: Hindawi journal article supplement (doi:10.1155/2016/6869415), 2016-01-01
Supplement: f1 [file 6869415.f1.pdf]

**Table S1. The clinicopathological data of the 8 patients selected for TEM assay**

| Characteristics                    | Patient number |             |           |             |           |             |             |             |
|------------------------------------|----------------|-------------|-----------|-------------|-----------|-------------|-------------|-------------|
|                                    | 1              | 2           | 3         | 4           | 5         | 6           | 7           | 8           |
| <b>Gender</b>                      | M              | M           | M         | M           | F         | F           | F           | M           |
| <b>Age(y)</b>                      | 46             | 42          | 67        | 74          | 27        | 50          | 47          | 61          |
| <b>Height (cm)</b>                 | 168            | 163         | 165       | 160         | 153       | 163         | 168         | 160         |
| <b>Weight (kg)</b>                 | 65             | 54          | 69        | 60          | 53        | 60          | 56          | 55          |
| <b>BMI</b>                         | 23.03          | 20.32       | 25.34     | 23.44       | 22.64     | 22.58       | 19.84       | 21.48       |
| <b>Tumor size(cm)</b>              | 4.8            | 5.4         | 8.3       | 4.5         | 3.1       | 5.2         | 4.6         | 7.2         |
| <b>Tumor location</b>              | L              | L           | UM        | L           | L         | L           | L           | L           |
| <b>Pathological type</b>           | AC             | AC          | AC        | AC          | AC        | AC          | AC          | AC          |
| <b>Lauren classification</b>       | Int            | Int         | Int       | Int         | Dif       | Int         | Dif         | Dif         |
| <b>Histologic grade</b>            | PD             | PD          | MD        | PD          | PD        | PD          | MD          | PD          |
| <b>LN metastasis (NMLN / NDLN)</b> | Pre (1/23)     | Pre (11/26) | Ab (0/20) | Pre (10/24) | Ab (0/32) | Pre (15/46) | Pre (12/45) | Pre (17/40) |
| <b>Tumor invasion</b>              | AGC            | AGC         | AGC       | AGC         | AGC       | AGC         | AGC         | AGC         |
| <b>TNM stage</b>                   | IIIA           | IIIC        | IIB       | IIIC        | IIB       | IIIC        | IIIC        | IIIC        |
| <b>VCE</b>                         | Ab             | Pre         | Pre       | Ab          | Ab        | Ab          | Pre         | Pre         |

Abbreviations: M, Male; F, Female; BMI, body mass index; L, Lower; UM, Up and Middle; AC, Adenocarcinoma; Int, Intestinal; Dif, Diffuse; MD, middle differentiation; PD, poor differentiation; LN metastasis, lymph node metastasis; NMLN, Number of metastatic lymph nodes; NDLN, Number of dissected lymph nodes; Pre, Presence; Ab, Absence; AGC, advantage gastric cancer; TNM stage, tumor node metastasis stage; VCE, vascular cancer embolus.
