# Supplementary material for: The Prognostic Role of SIRT1-Autophagy Axis in Gastric Cancer
Source: Hindawi journal article supplement (doi:10.1155/2016/6869415), 2016-01-01
Supplement: f2 [file 6869415.f2.pdf]

**Table S2. Beclin-1 and SIRT1 expression in 96 patients with GC and adjacent NNM**

| Histological types  | N  | Beclin-1 expression |           | SIRT1 expression |           |
|---------------------|----|---------------------|-----------|------------------|-----------|
|                     |    | High (%)            | <i>p</i>  | High (%)         | <i>p</i>  |
| <b>Adjacent NNM</b> | 96 | 24(25.0)            | < 0.001** | 19(19.8)         | < 0.001** |
| <b>Cancer</b>       | 96 | 57(59.4)            |           | 53(55.2)         |           |

Abbreviations: Adjacent NNM, adjacent non-neoplastic mucosa; N, number of patients; \*\* $p < 0.001$ .
